# Supplementary material for: Synthesis, structure, circular dichroism of a Δ(−)546-di-μ-hydroxo-tetrakis(S-prolinato)dicobalt(iii) complex and NMR study of its interaction with chiral and non-chiral probes in solutions
Source: Royal Society of Chemistry journal article supplement (doi:10.1039/c2nj40447h), 2012-01-01
Supplement: c2nj40447h.pdf [file c2nj40447h.pdf]

## Electronic Supplementary Information

# Synthesis, Structure, Circular Dichroism of $\Delta(-)_{546}$ -Di- $\mu$ -hydroxo-tetrakis(S-prolinato)dicobalt(III) Complex and NMR Study of its Interaction with Chiral and non-Chiral Probes in Solutions

Alexander Prikhod'ko,<sup>a\*</sup> Fabrice Pointillart,<sup>b</sup> Stéphane Golhen,<sup>b</sup> Konstantin S. Gavrilenko,<sup>c</sup> Lahcène Ouahab,<sup>b</sup> Sergey V. Kolotilov<sup>d\*</sup>

10

<sup>a</sup> Karlsruhe Institute of Technology, Institute of Catalysis Research and Technology (IKFT), Postfach 3640, 76021 Karlsruhe, Germany. E-mail: alexander.prikhodko@gmx.de; Fax: +49-0721-608-22244;

15 <sup>b</sup> Organométalliques: Matériaux et Catalyse, Institut des Sciences Chimiques de Rennes, UMR 6226 CNRS-Université de Rennes 1 Campus de Beaulieu, 35042 Rennes Cedex, France. E-mail: lahcene.ouahab@univ-rennes1.fr; Fax: +33-0223-23-6840; Tel: +33-0223-23-56-59

<sup>c</sup> Research-And-Education Chemico-biological Center, National Taras Shevchenko University of Kyiv, Chervonotkackaya str., 61, 20 03022, Kiev

<sup>d</sup> L.V. Pisarzhevskii Institute of Physical Chemistry of the National Academy of Sciences of the Ukraine, Prospekt Nauki 31, Kiev, 03028, Ukraine. E-mail: svk001@mail.ru; Fax: +38-044-525-6216; Tel: +38-044-525-6661

25

Table S1. pK values and details of concentrations measurement by NMR for the carboxylic acids used in NMR study of solubility of **1** in CD<sub>3</sub>OD.

| Acid                                                                                                         | pK<br>(according to<br><a href="https://scifinder.cas.org/">https://scifinder.cas.org/</a> ) | Peaks in <sup>1</sup> H-NMR spectra<br>used for integration – I(X) |
|--------------------------------------------------------------------------------------------------------------|----------------------------------------------------------------------------------------------|--------------------------------------------------------------------|
| 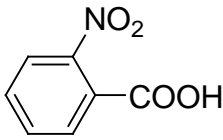<br>2-Nitrobenzoic acid     | 2.19±0.25                                                                                    | 7.90-7.67 ppm (m, 4H, C <sub>6</sub> H <sub>4</sub> )              |
| <br>S-proline and R-proline | 2.35±0.20                                                                                    | 4.01-3.95 ppm (m, 1H, α)                                           |
| <br>N-Benzoyl-S-proline     | 3.68±0.20                                                                                    | 7.58-7.42 ppm (m, 5H, C <sub>6</sub> H <sub>5</sub> )              |
| <br>N-Benzoyl-S-alanine   | 3.86±0.10                                                                                    | 7.87-7.84 ppm (m, 2H, C <sub>6</sub> H <sub>5</sub> )              |
| <br>4-Chlorobenzoic acid  | 3.97±0.10                                                                                    | 8.02-7.98 ppm (d, 2H, C <sub>6</sub> H <sub>4</sub> )              |
| <br>4-Methylbenzoic acid  | 4.37±0.10                                                                                    | 7.92-7.89 ppm (d, 2H, C <sub>6</sub> H <sub>4</sub> )              |
| <br>4-Aminobenzoic acid   | 4.86±0.10                                                                                    | 6.65-6.63 ppm (d, 2H, C <sub>6</sub> H <sub>4</sub> )              |

5

*Note:* Although pK values, listed in Table S2, were determined for aqueous solutions, we suggest that the tendency for CD<sub>3</sub>OD is the same.

Table S2. Selected angles in  $\text{Co}_2(\mu\text{-OH})_2(\text{S-Pro})_4\cdot 4\text{H}_2\text{O}$ .

| Angle            | Value, deg | Angle            | Value, deg |
|------------------|------------|------------------|------------|
| O(1)–Co(1)–O(2)  | 80.62(11)  | O(2)–Co(2)–O(1)  | 80.18(10)  |
| O(2)–Co(1)–O(7)  | 94.01(12)  | O(2)–Co(2)–O(5)  | 88.45(12)  |
| O(1)–Co(1)–O(7)  | 172.53(13) | O(3)–Co(2)–O(5)  | 177.30(12) |
| O(1)–Co(1)–O(9)  | 94.11(13)  | O(2)–Co(2)–O(3)  | 93.15(12)  |
| O(2)–Co(1)–O(9)  | 172.12(12) | O(3)–Co(2)–O(1)  | 89.17(12)  |
| O(7)–Co(1)–O(9)  | 91.74(12)  | O(5)–Co(2)–O(1)  | 93.25(12)  |
| O(1)–Co(1)–N(2)  | 88.60(13)  | O(2)–Co(2)–N(3)  | 175.08(14) |
| O(2)–Co(1)–N(2)  | 92.47(13)  | O(3)–Co(2)–N(3)  | 86.46(15)  |
| O(7)–Co(1)–N(2)  | 86.43(13)  | O(5)–Co(2)–N(3)  | 92.12(15)  |
| O(9)–Co(1)–N(2)  | 93.26(13)  | O(1)–Co(2)–N(3)  | 94.91(14)  |
| O(1)–Co(1)–N(1)  | 92.44(13)  | O(2)–Co(2)–N(4)  | 92.77(13)  |
| O(2)–Co(1)–N(1)  | 88.44(12)  | O(3)–Co(2)–N(4)  | 91.91(14)  |
| O(7)–Co(1)–N(1)  | 92.60(13)  | O(5)–Co(2)–N(4)  | 85.84(13)  |
| O(9)–Co(1)–N(1)  | 85.92(13)  | O(1)–Co(2)–N(4)  | 172.91(14) |
| N(2)–Co(1)–N(1)  | 178.71(13) | N(3)–Co(2)–N(4)  | 92.15(16)  |
| Co(1)–O(1)–Co(2) | 99.11(12)  | Co(2)–O(2)–Co(1) | 100.09(12) |

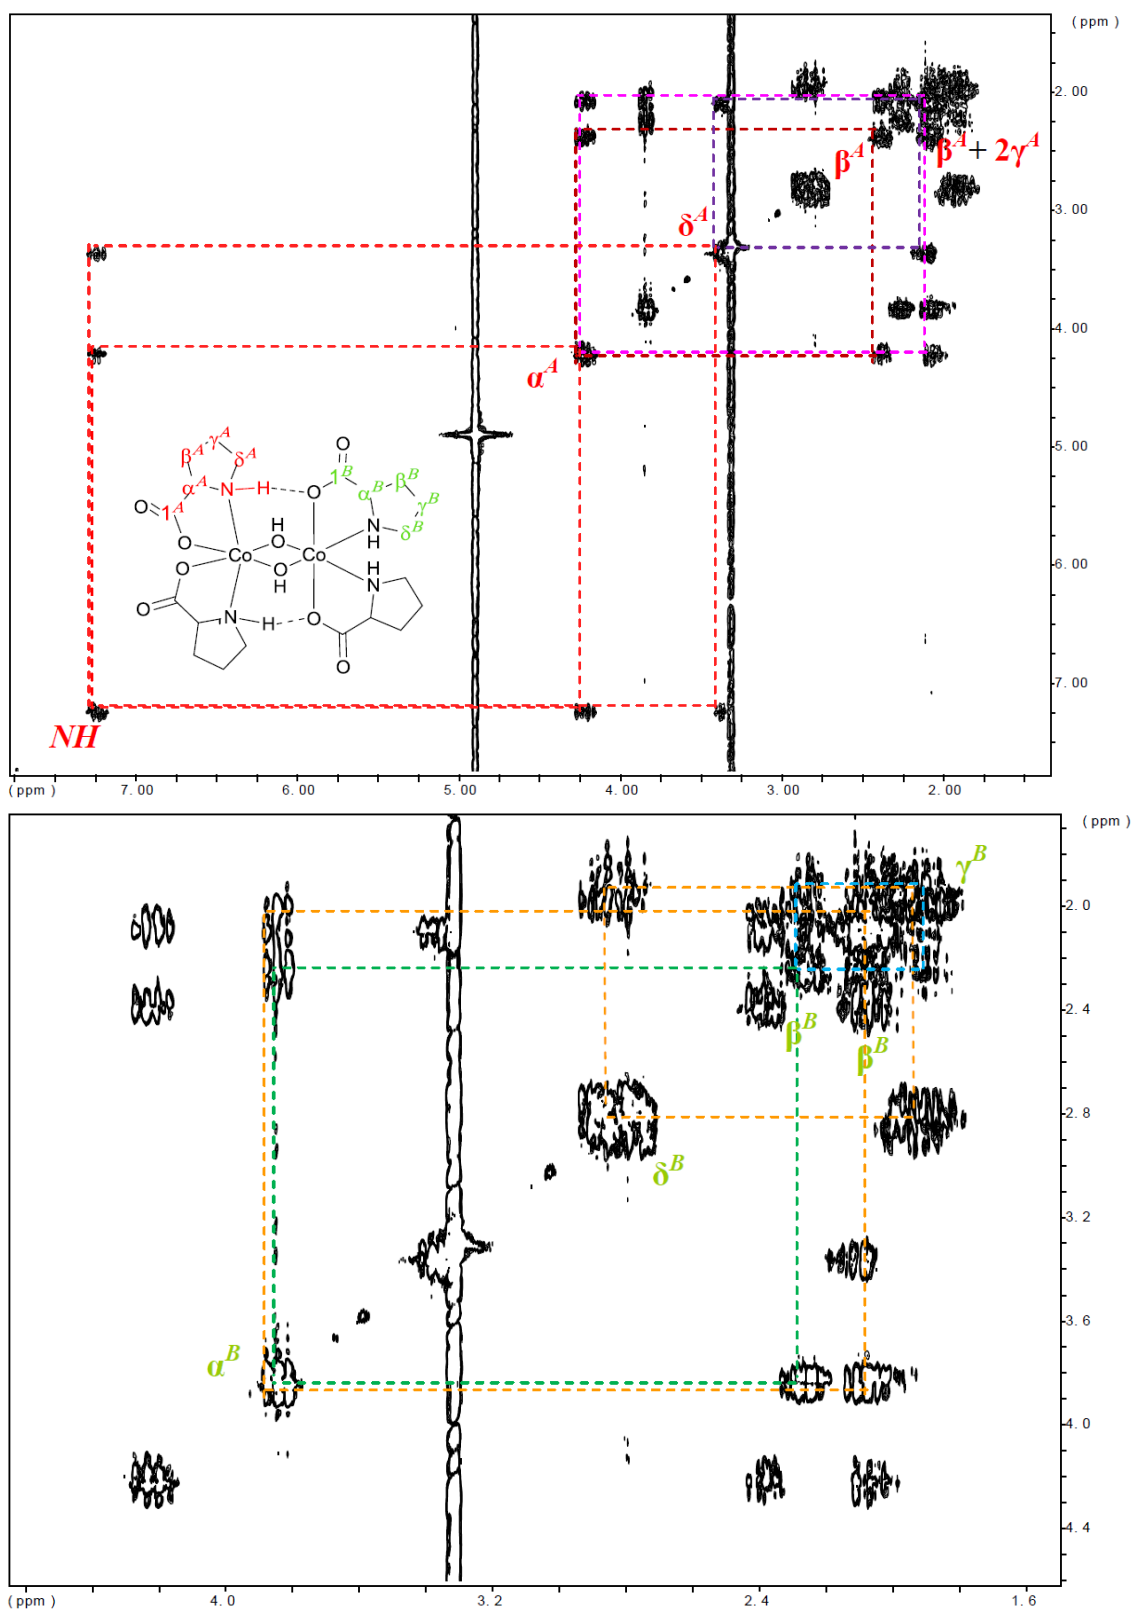

5 Figure S1. Connectivity of the resonances in HH-COSY spectra of **1** in CD<sub>3</sub>OD.

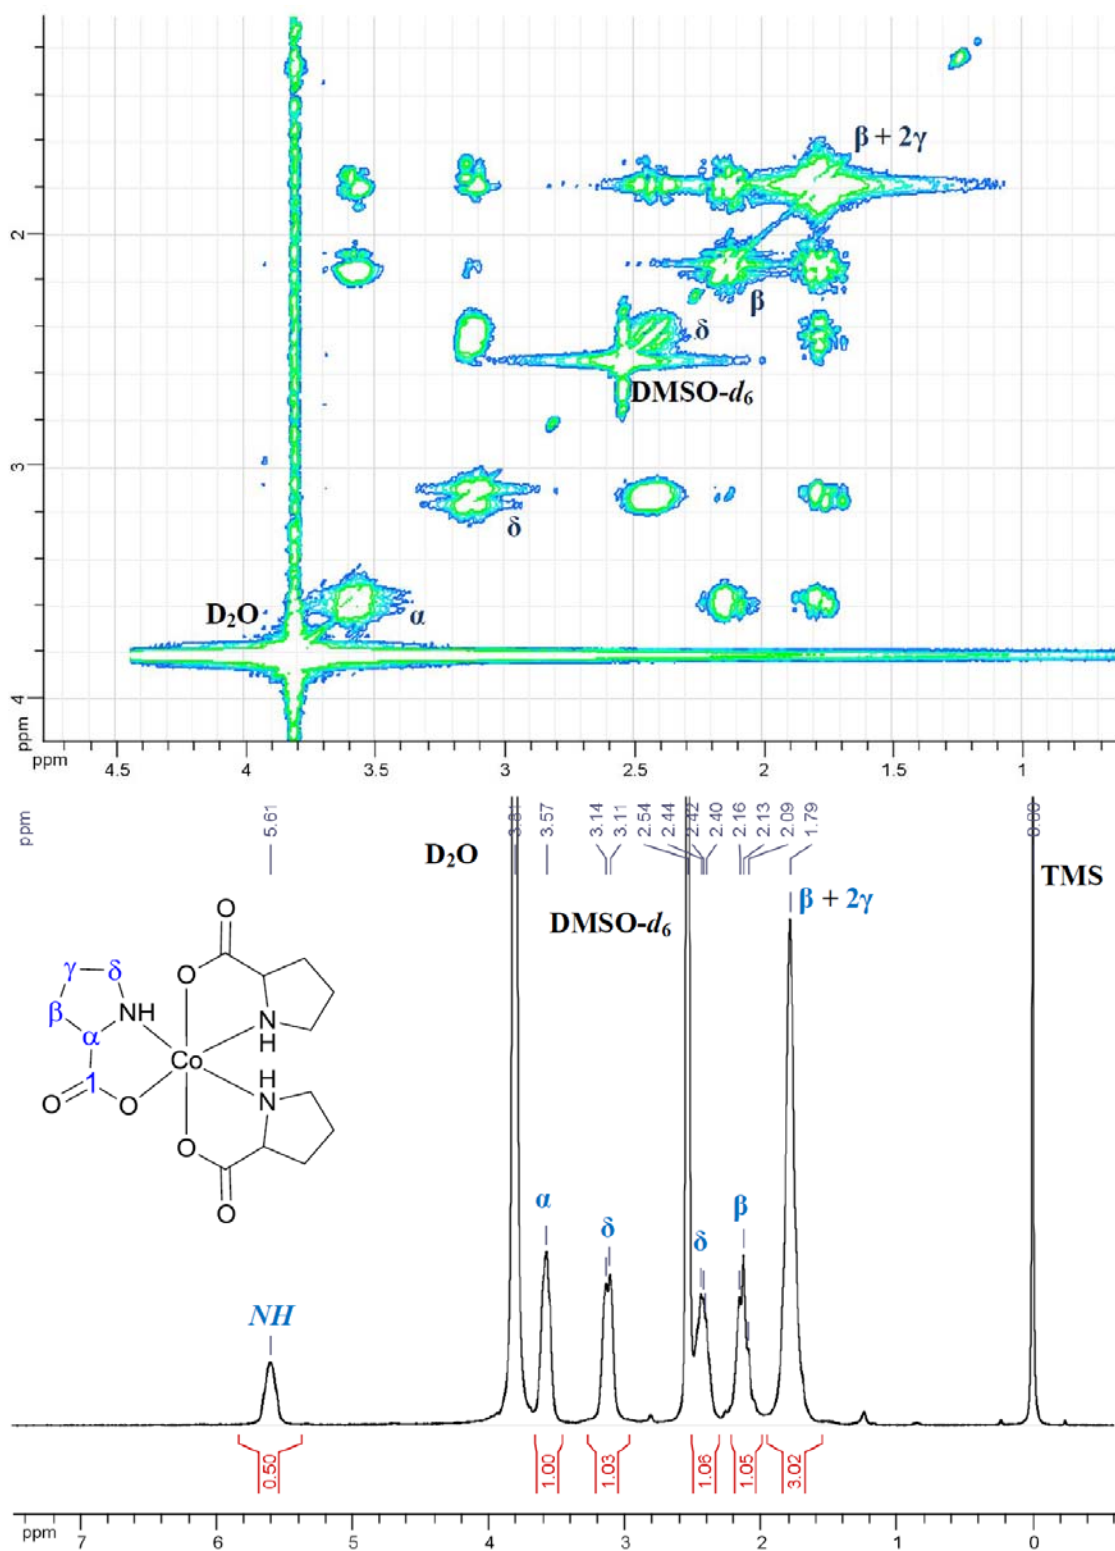

Figure S2. HH-COSY and <sup>1</sup>H-NMR spectra of **2** solution in mixture of dimethylsulfoxide-*d*<sub>6</sub> (80 %) and deuterium oxide (20% by volume).

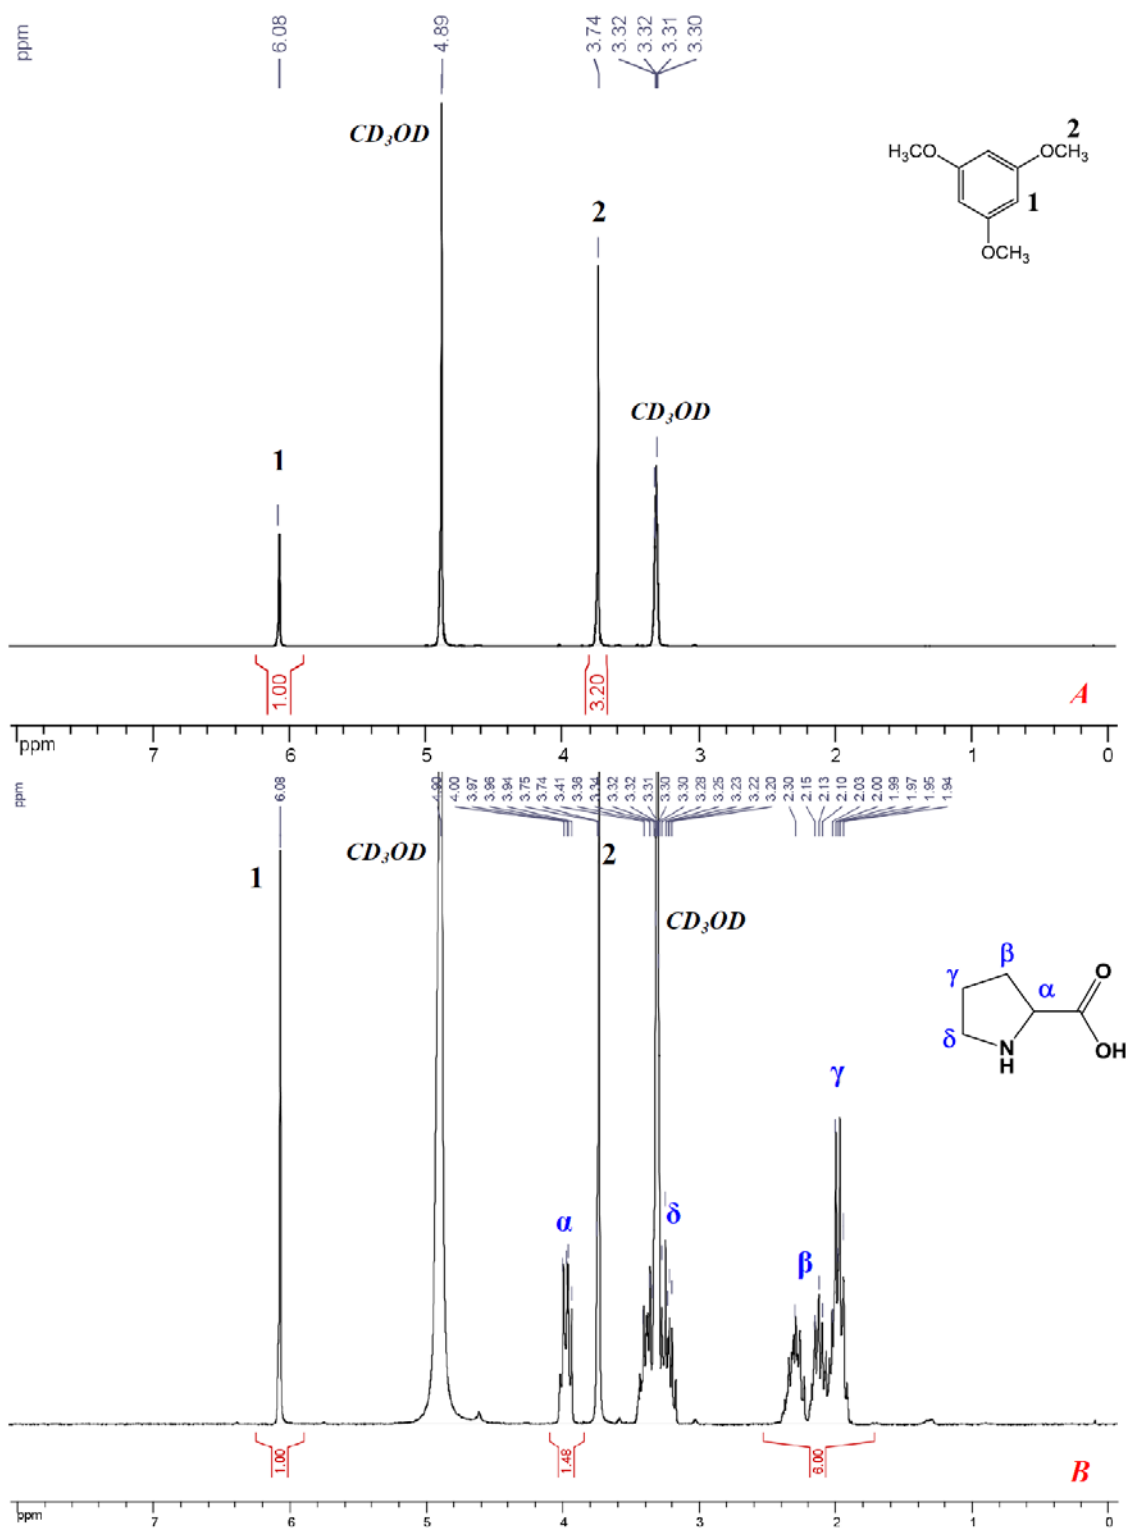

Figure S3.  $^1\text{H-NMR}$  spectra in methanol- $d_4$ :

- 5 A). solution of TMB ( $0.0094 \text{ mol}\cdot\text{L}^{-1}$ );  
B). solution of TMB ( $0.0094 \text{ mol}\cdot\text{L}^{-1}$ ) and S-proline ( $0.0425 \text{ mol}\cdot\text{L}^{-1}$ ).

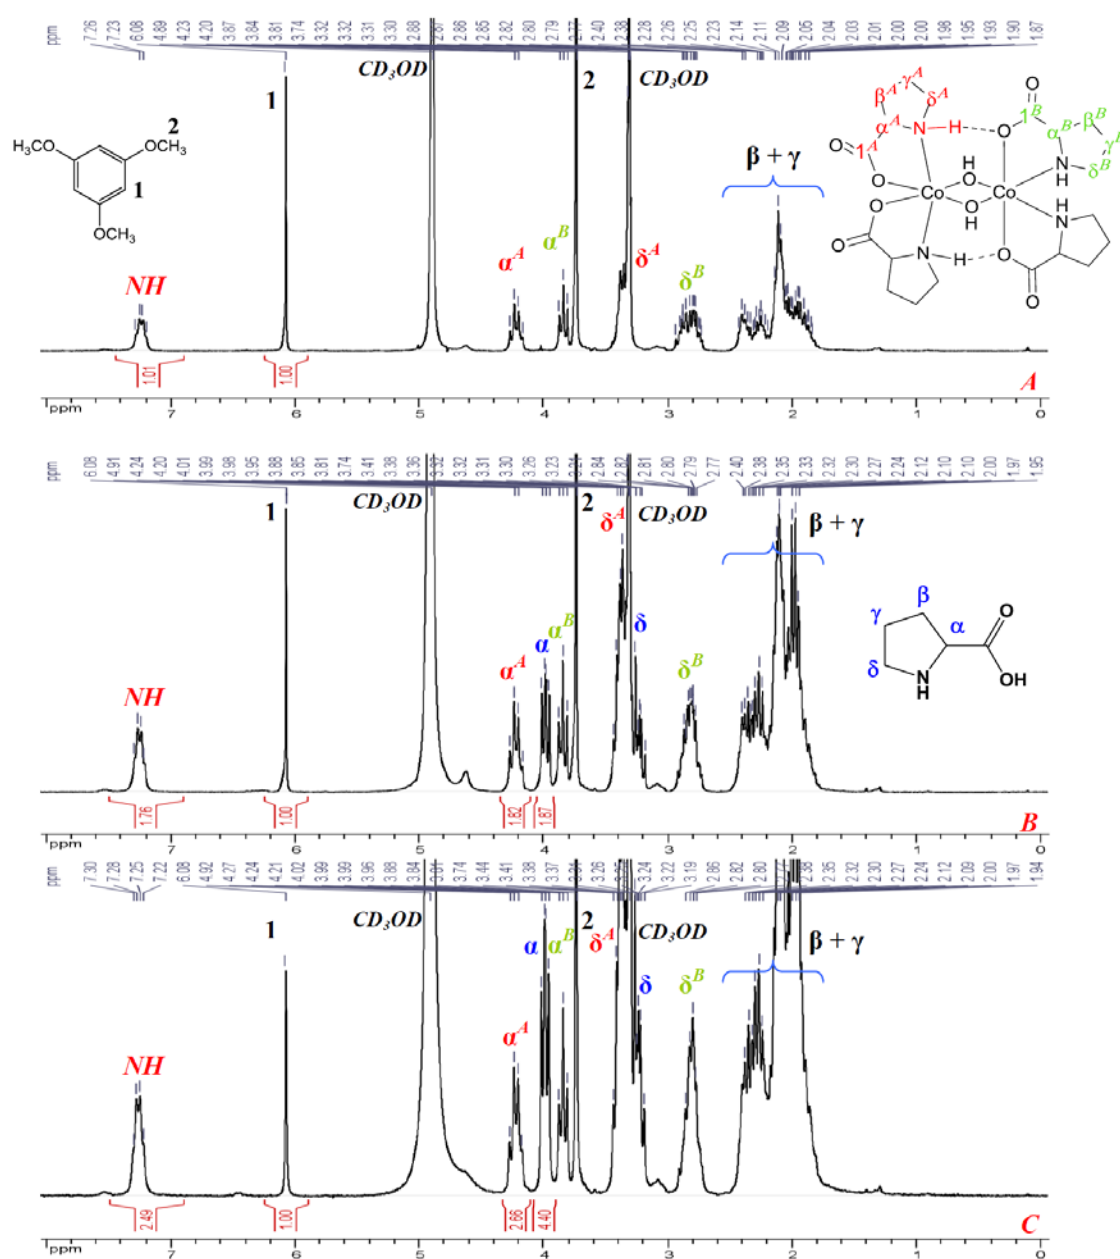

Figure S4.  $^1\text{H-NMR}$  spectra in methanol- $d_4$ :

A). solution of TMB ( $0.0094 \text{ mol}\cdot\text{L}^{-1}$ ) and  $\text{Co}_2(\mu\text{-OH})_2(\text{S-prol})_4$  ( $0.0140 \text{ mol}\cdot\text{L}^{-1}$ ) – saturated at ambient temperature;

B). solution of TMB ( $0.0094 \text{ mol}\cdot\text{L}^{-1}$ ), S-proline ( $0.0529 \text{ mol}\cdot\text{L}^{-1}$ ) and  $\text{Co}_2(\mu\text{-OH})_2(\text{S-prol})_4$  ( $0.0254 \text{ mol}\cdot\text{L}^{-1}$ );

C). solution of TMB ( $0.0094 \text{ mol}\cdot\text{L}^{-1}$ ), S-proline ( $0.1247 \text{ mol}\cdot\text{L}^{-1}$ ) and  $\text{Co}_2(\mu\text{-OH})_2(\text{S-prol})_4$  ( $0.0365 \text{ mol}\cdot\text{L}^{-1}$ ).

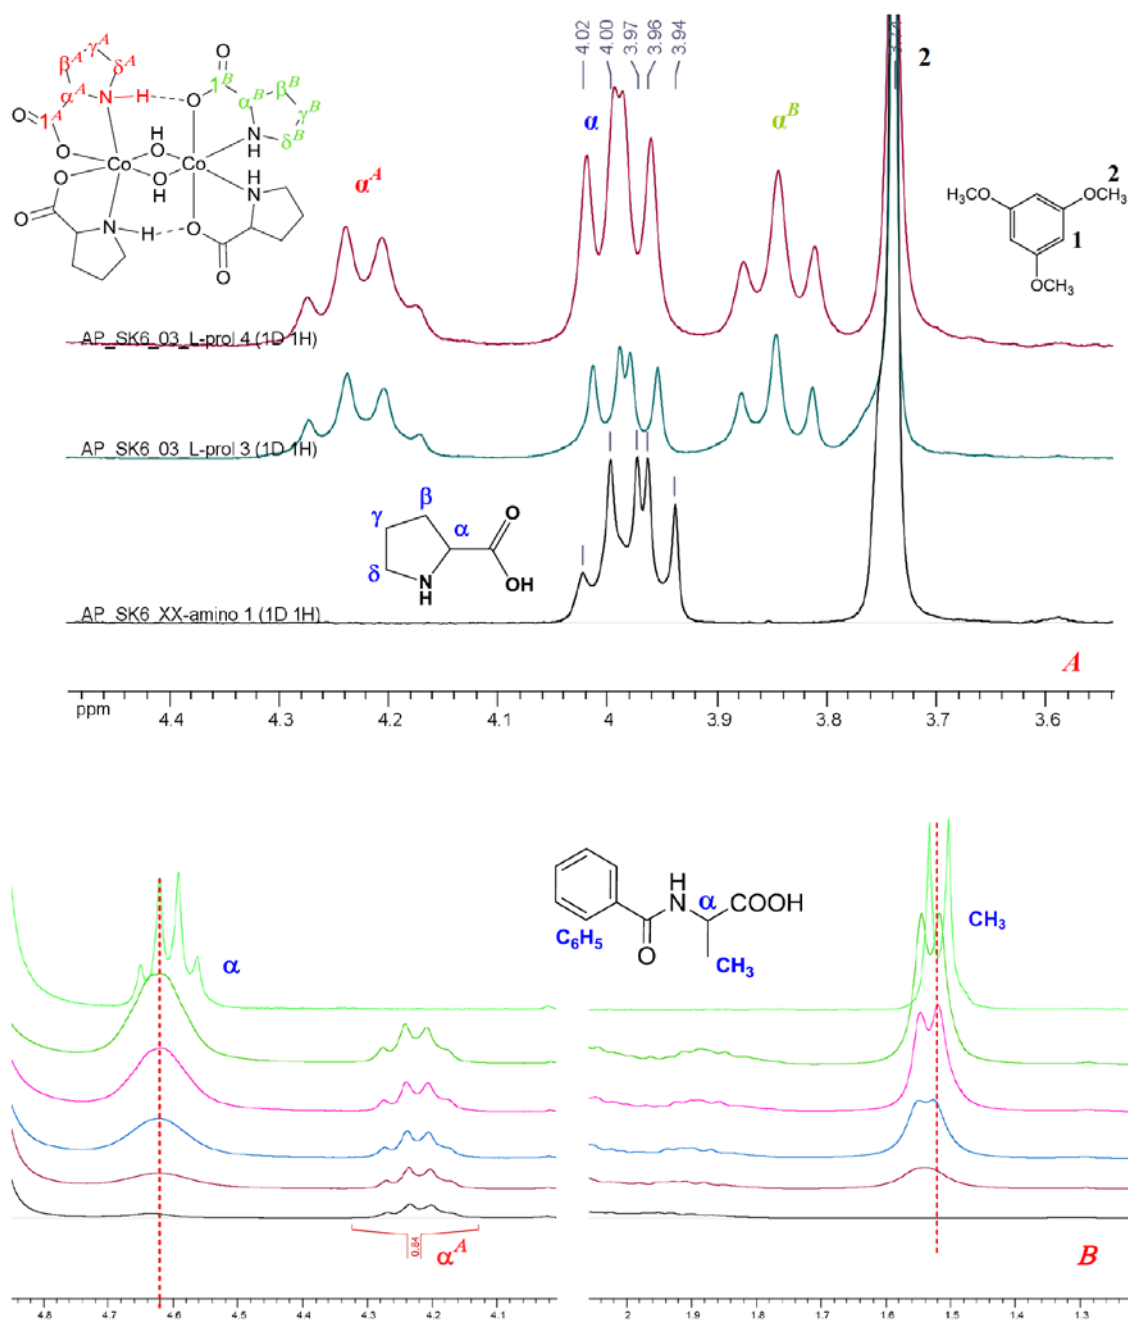

5

Figure S5. Representative parts of  $^1\text{H}$  NMR spectra showing: A) changes in peaks of S-proline under increasing concentration of **1**; B) changes of the  $^1\text{H}$  NMR spectra under increasing concentration of N-benzoyl-S-alanine (the spectrum on the top corresponds to pure N-benzoyl-S-alanine).



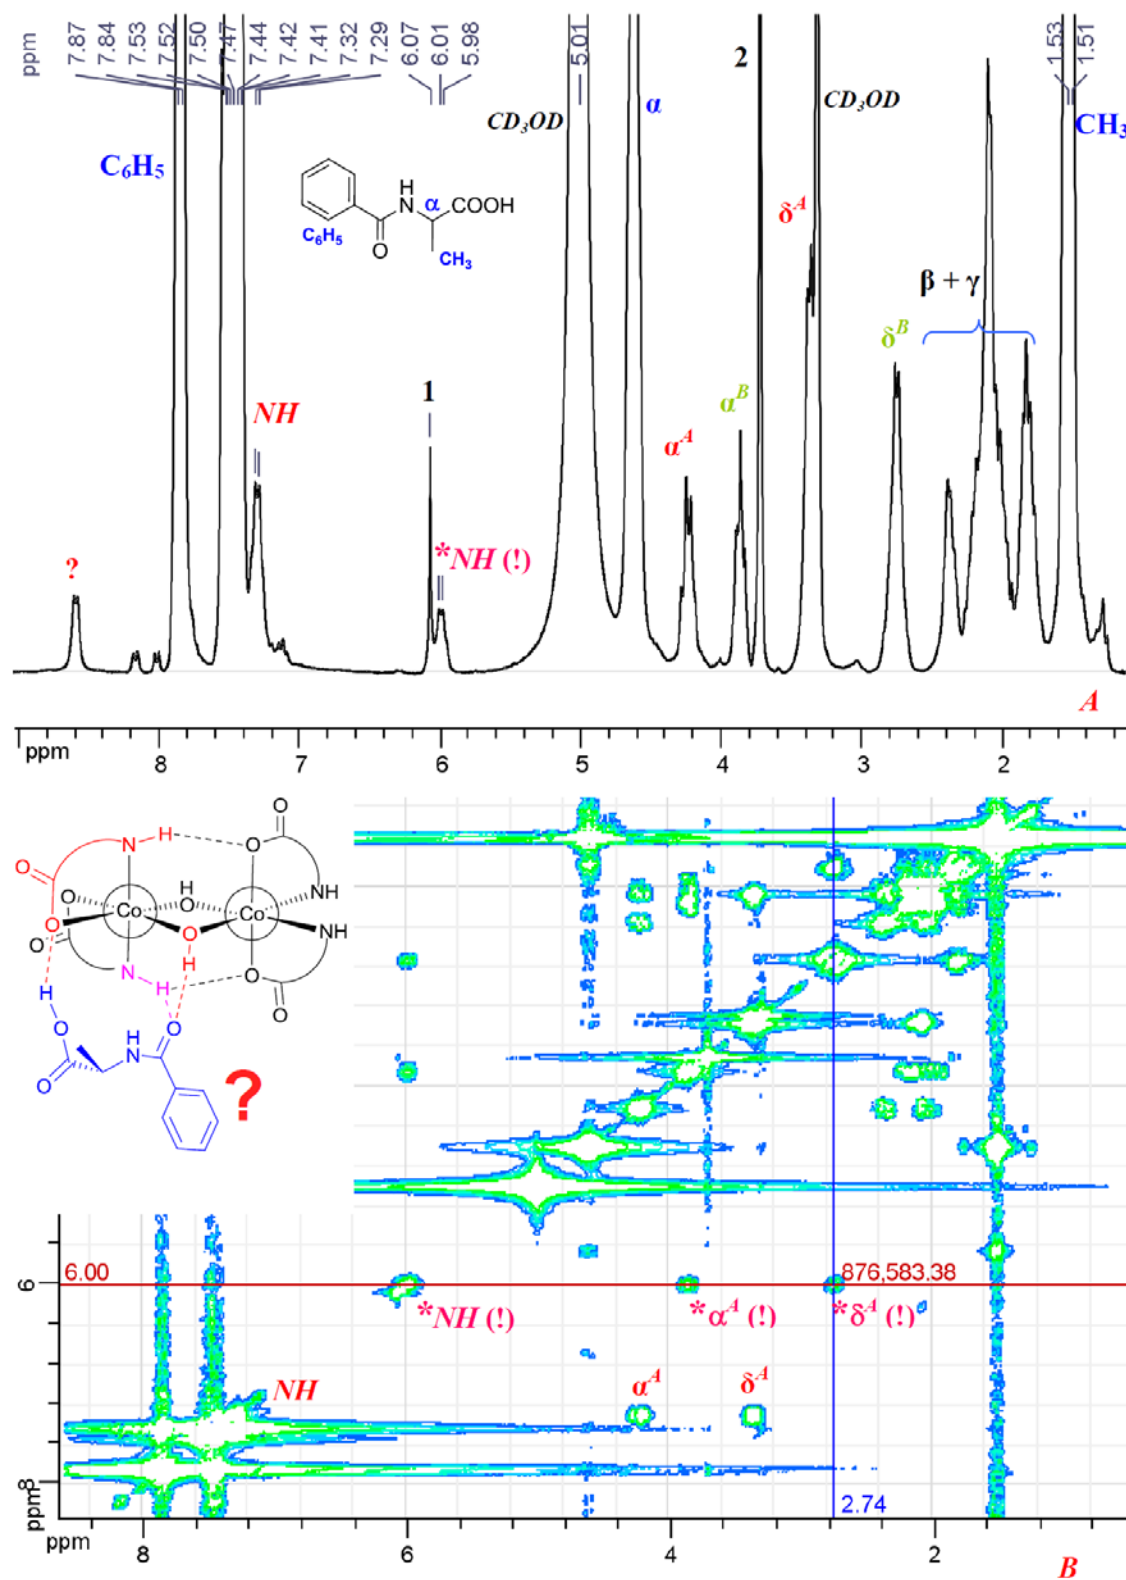

Figure S6.  $^1\text{H-NMR}$  (A) and HH-COSY (B) spectra showing appearance of additional peaks (presumably belonging to new dinuclear cobalt(III) species); estimated concentrations of the components:  $c(\text{TMB}) = 0.0094 \text{ mol}\cdot\text{L}^{-1}$ ;  $c(\mathbf{1}) = 0.07 \text{ mol}\cdot\text{L}^{-1}$ ;  $c(\text{N-benzoyl-S-alanine}) = 0.7 \text{ mol}\cdot\text{L}^{-1}$ . Inset shows the model of possible interactions.

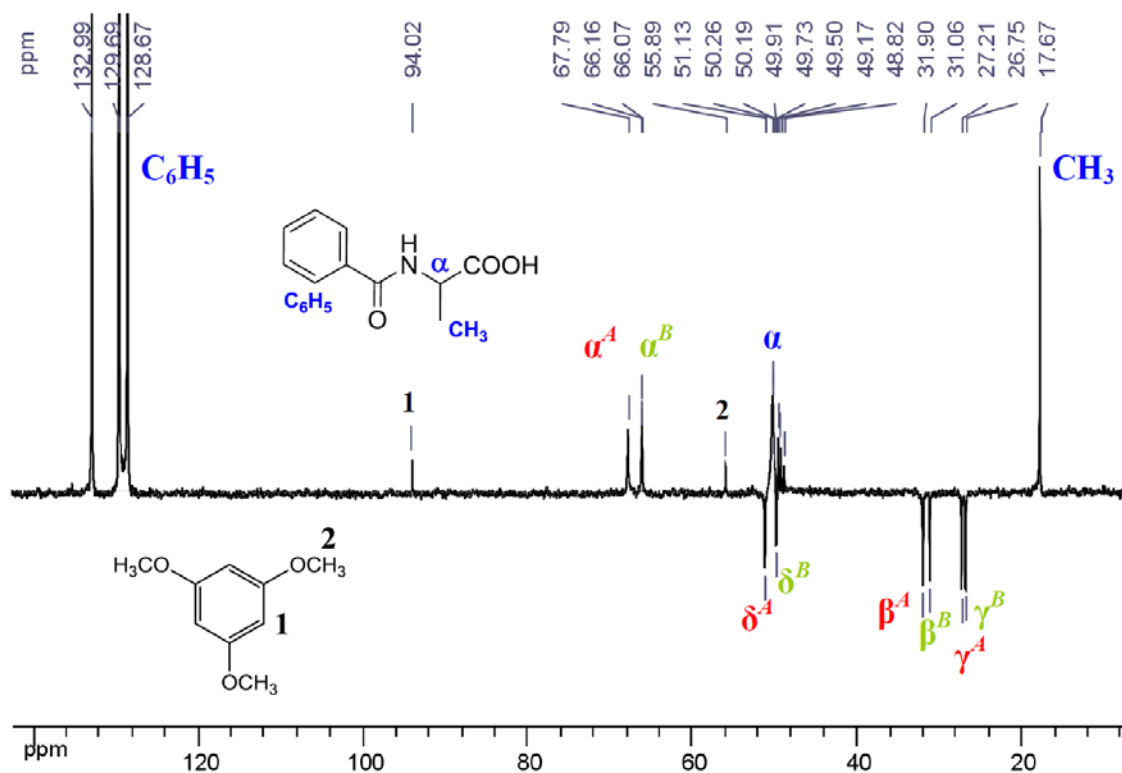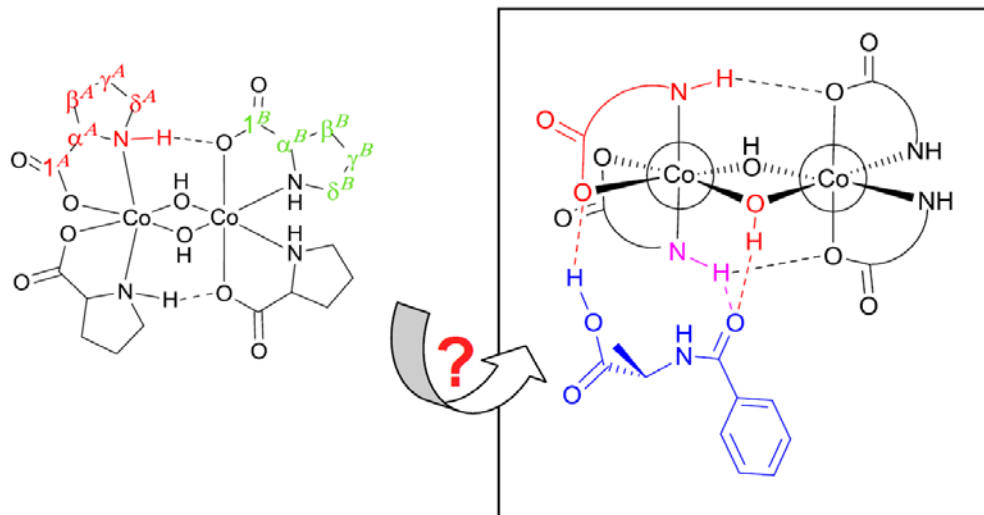

5

Figure S7. DEPT 135 spectrum, estimated concentrations of the components:  
 $c(\text{TMB}) = 0.0094 \text{ mol} \cdot \text{L}^{-1}$ ;  $c(\mathbf{1}) = 0.07 \text{ mol} \cdot \text{L}^{-1}$ ;  $c(\text{N-benzoyl-S-alanine}) = 0.7 \text{ mol} \cdot \text{L}^{-1}$ ). Inset shows the model of possible interactions.

10

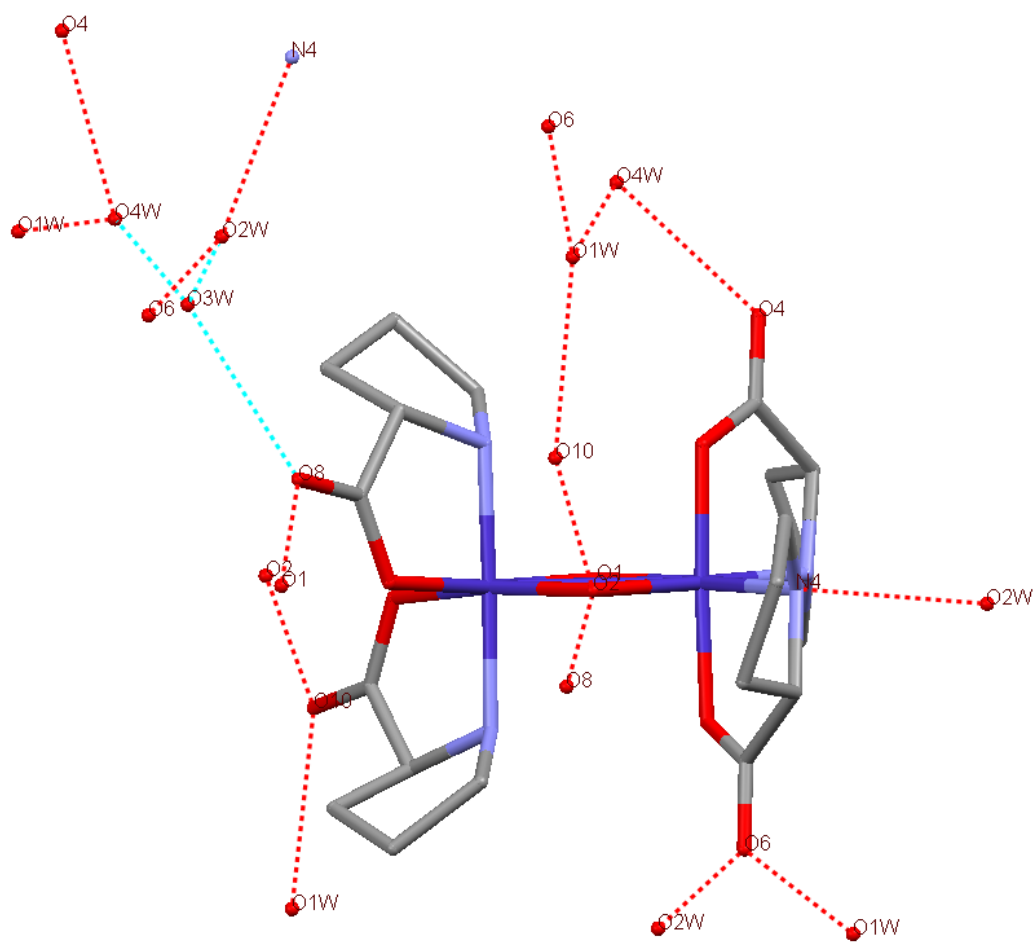

Figure S8. H-bonds in crystal structure of  $\text{Co}_2(\mu\text{-OH})_2(\text{S-Pro})_4 \cdot 4\text{H}_2\text{O}$ .
